# Supplementary material for: Hierarchically porous carbon black/graphene hybrid fibers for high performance flexible supercapacitors
Source: Royal Society of Chemistry journal article supplement (doi:10.1039/c6ra08799j), 2016-01-01
Supplement: c6ra08799j1.pdf [file c6ra08799j1.pdf]

## Supporting Information

### **Hierarchically Porous Carbon black/Graphene hybrid Fibers for High Performance Flexible Supercapacitors**

Wujun Ma, Shaohua Chen, Shengyuan Yang, Meifang Zhu\*

*State Key Laboratory for Modification of Chemical Fibers and Polymer Materials*

*College of Material Science and Engineering, Donghua University, Shanghai 201620, P. R. China.*

\* Corresponding author, email address: zhumpf@dhu.edu.cn

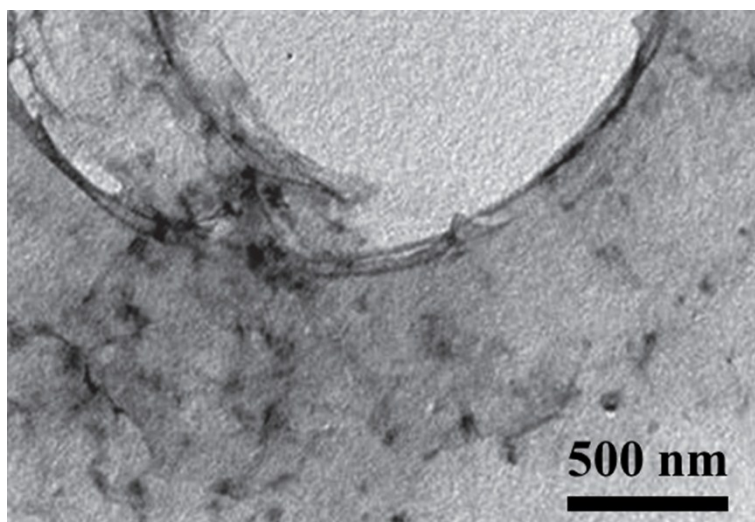

**Figure S1.** Cross-sectional TEM image of the hybrid fiber.

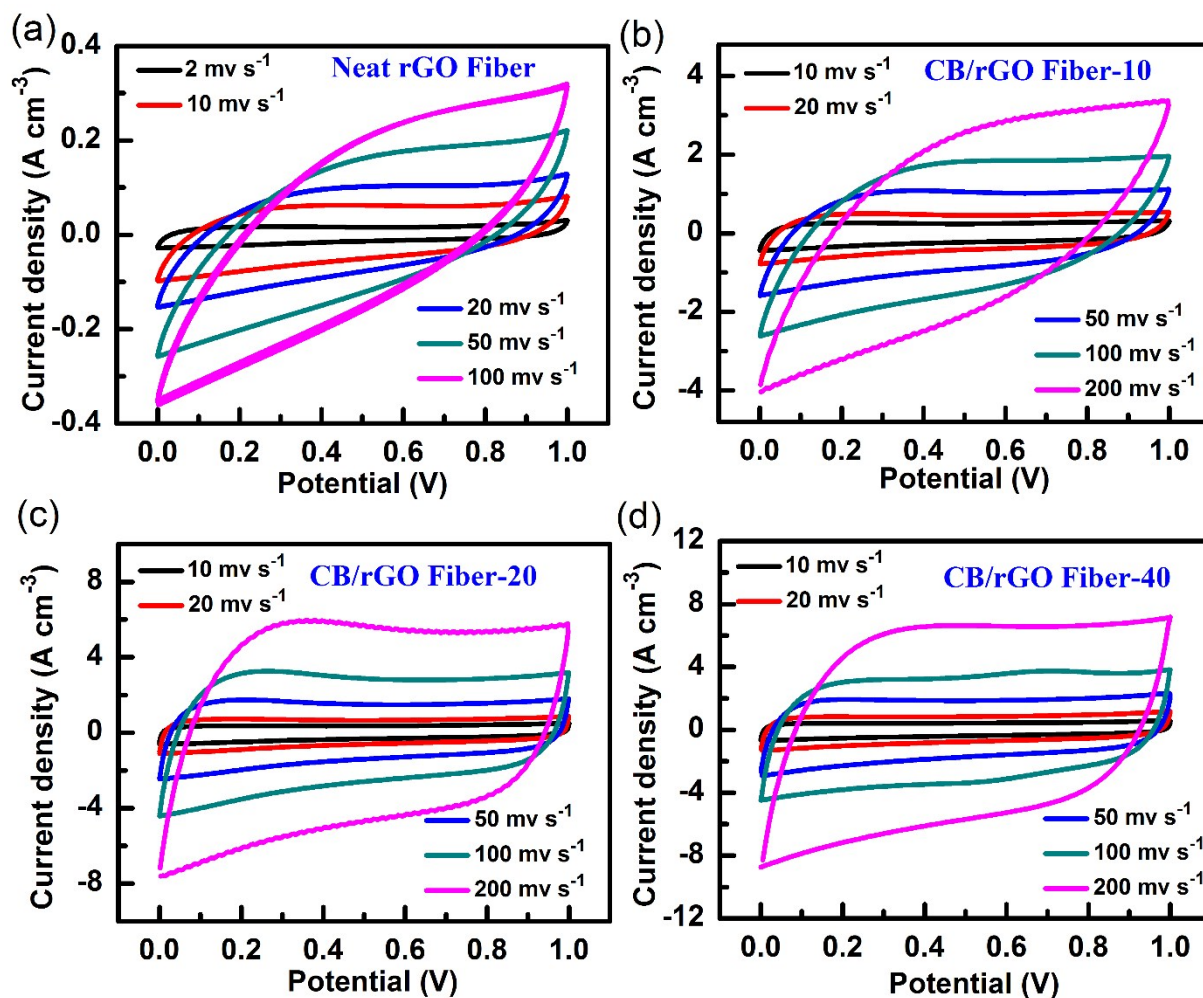

**Figure S2.** CV curves of the supercapacitors assembled from rGO and CB/rGO hybrid fibers. (a) rGO fiber; (b-d) Hybrid fibers with CB content of 10, 20 and 40 wt%, respectively.
